# Supplementary material
Source: PubMed Central journal article supplement (PMC2854029)
Supplement: NIHMS178898-supplement-1.pdf [file NIHMS178898-supplement-1.pdf]

## Supplemental Information

### Medication load

A problem for all neuroimaging studies of bipolar disorder (BD) is the potential confounding effect of psychotropic medication, as it is difficult to recruit medication-free BD individuals into such studies (1). We wished to examine the potential impact of psychotropic medication upon BOLD signal in BD and major depressive disorder (MDD) individuals using an index of “medication load”. This index reflects the number and dose of different medications for each individual: the greater the number and dose of the medication, the greater the medication load. This strategy has been employed in our previous neuroimaging studies in BD (1-3). For antidepressants and mood-stabilizers we converted each medication into low- or high-dose groupings. We coded as low-dose individuals on levels 1 and 2, and as high dose, individuals on levels 3 and 4 of these previous criteria (4). We added a no-dose subtype for those not taking these medications. We converted antipsychotics into chlorpromazine dose equivalents, and coded as 0, 1 or 2, for no medication, chlorpromazine equivalents dose equal or below, or above, mean effective daily dose (ED50) of chlorpromazine (5). Benzodiazepine dose was coded as 0, 1 or 2, with reference to the midpoint of the Physician’s Desk Reference-recommended daily dose range for each medication. We generated a composite measure of medication load by summing all individual medication codes for each medication category for each individual participant. This strategy has been employed in our previous neuroimaging studies in BD (1-3).

### Data acquisition

Neuroimaging data were collected using a 3.0 Tesla Siemens Allegra MRI scanner at the University of Pittsburgh/CMU Brain Imaging Research Center. Structural 3D sagittal MPRAGE

images were acquired in the same session (TE : 2.48 ms, TR: 1630 ms, Flip angle 8°, Field of view: 200 mm, Slice thickness: 1 mm, Matrix: 256 x 256, 192 continuous slices). BOLD functional images were then acquired with a gradient echo EPI sequence covering 33 axial slices (3 mm thick, 0 mm gap; TR/TE = 2000/25 msec, FOV = 24 cm, matrix = 64 x 64). All scanning parameters were selected to optimize the BOLD signal quality while maintaining a sufficient number of slices to acquire whole-brain data.

### **Exploratory whole brain neuroimaging data analyses**

A second-level random-effects group analysis was conducted on the t-contrast images generated in the previous single-subject analyses in a 4 (group) by 3 (emotion intensity condition) repeated-measures analysis of variance (ANOVA) to explore significant whole brain neural activity in main effect of group and group by condition interaction. Clusters were considered significant if they survived inferences made at first  $p < 0.001$ , uncorrected for multiple comparisons, and second, a minimum of three voxels within the cluster.

### **Within group analysis in the amygdala**

#### ***Sad experiment***

Within group analysis revealed significant left amygdala activity to intense sad faces and bilaterally in response to neutral faces in BD depressed individuals (BDd) (Table S1).

#### ***Fear experiment***

Within group analysis revealed significant amygdala activation in the left side in response to mild fear faces in the BD depressed individuals, bilaterally in response to intense fear faces and

right sided in response to neutral faces in the BD remitted individuals (BDr), and bilaterally in response to neutral faces in the healthy control (HC) individuals (Table S1).

### ***Happy experiment***

Within group analysis revealed significant amygdala activation in the right side in response to intense happy faces in the BD depressed individuals, and left sided in response to intense and mild happy faces in the MDD depressed individuals (Table S1).

### **Females only**

Since the majority of the participants were females, we also performed a region of interest (ROI) analysis with the female subgroup (Table S5). Similarly with our principal results, only a main effect of group to the left amygdala during the sad experiment was significant (coordinates:  $x=-21$ ,  $y=-3$  and  $z=-18$ ;  $k=9$  voxels;  $F(3, 135)=3.59$ ;  $p=0.015$ ). Post hoc analyses for mean amygdala activity to all emotion intensities indicated significantly greater left amygdala activity in BDd versus BDr ( $t(22)=4.4$ ;  $p<0.001$ ;  $d=1.84$ ), BDd versus depressed recurrent MDD individuals ( $t(25)=3.4$ ;  $p=0.002$ ;  $d=1.31$ ), and versus HC ( $t(24)=3.5$ ;  $p=0.002$ ;  $d=1.35$ ), over all emotional intensities. Further analyses revealed that the significant increase in left amygdala activity in BDd versus BDr, versus depressed recurrent MDD individuals, and versus HC was evident to neutral expressions: BDd versus BDr: neutral:  $t(22)=3.9$ ;  $p=0.001$ ;  $d=1.63$ ; BDd versus depressed recurrent MDD individuals: neutral:  $t(25)=3.3$ ;  $p=0.003$ ;  $d=1.28$ ; BDd versus HC: neutral:  $t(24)=3.5$ ;  $p=0.002$ ;  $d=1.38$ .

### **Exploratory whole brain analyses**

During the Happy experiment, whole brain ANOVA revealed a significant group by emotion interaction in: right hippocampus, right parahippocampal gyrus, right anterior cingulate, right temporal lobe and left posterior cingulate gyrus (Table S6).

During the Fear experiment, whole brain ANOVA revealed a significant main effect of group: right cuneus and left fusiform gyrus; and a group by emotion interaction: right inferior frontal gyrus and right thalamus (Table S6).

During the Sad experiment, whole brain ANOVA revealed a significant main effect of group: right cuneus and precuneus, left lingual gyrus and left inferior parietal lobule; and a group by emotion interaction: left amygdala and right parahippocampal gyrus (Table S6).

**Table S1.** Within group patterns of amygdala activity during the Happy, Sad and Fear experiments

| Region                  |         | Side | MNI Coordinates |    |     | k  | t    | z    | p      |
|-------------------------|---------|------|-----------------|----|-----|----|------|------|--------|
|                         |         |      | X               | Y  | Z   |    |      |      |        |
| <b>Happy Experiment</b> |         |      |                 |    |     |    |      |      |        |
| BDd                     |         |      |                 |    |     |    |      |      |        |
| Amygdala                | Intense | R    | 18              | -6 | -15 | 10 | 2.19 | 2.17 | 0.015  |
| MDDd                    |         |      |                 |    |     |    |      |      |        |
| Amygdala                | Intense | L    | -21             | -9 | -9  | 9  | 2.22 | 2.20 | 0.014  |
|                         | Mild    | L    | -21             | -3 | -18 | 15 | 2.27 | 2.25 | 0.012  |
| <b>Sad Experiment</b>   |         |      |                 |    |     |    |      |      |        |
| BDd                     |         |      |                 |    |     |    |      |      |        |
| Amygdala                | Intense | L    | -21             | -3 | -15 | 17 | 3.07 | 3.02 | 0.001  |
|                         | Neutral | L    | -15             | -6 | -15 | 25 | 4.27 | 4.15 | <0.001 |
|                         |         | R    | 24              | 0  | -18 | 9  | 2.28 | 2.26 | 0.012  |
| <b>Fear Experiment</b>  |         |      |                 |    |     |    |      |      |        |
| BDd                     |         |      |                 |    |     |    |      |      |        |
| Amygdala                | Mild    | L    | -18             | -6 | -18 | 18 | 2.55 | 2.53 | 0.006  |
| BDr                     |         |      |                 |    |     |    |      |      |        |
| Amygdala                | Intense | L    | -21             | -3 | -18 | 9  | 3.19 | 3.13 | 0.001  |
|                         |         | R    | 21              | -3 | -15 | 10 | 3.11 | 3.06 | 0.001  |
|                         | Neutral | R    | 18              | -6 | -15 | 16 | 2.72 | 2.69 | 0.004  |
| HC                      |         |      |                 |    |     |    |      |      |        |
| Amygdala                | Neutral | L    | -24             | -3 | -15 | 9  | 2.09 | 2.07 | 0.019  |
|                         |         | R    | 18              | -6 | -21 | 9  | 2.43 | 2.41 | 0.008  |

R, right; L, left; HC, healthy control participants; MDDd, major depressive disorder patients in depressed episode; BDd, bipolar disorder patients in depressed episode; BDr, bipolar disorder patients in remission.

k: cluster size; Coordinates correspond to the stereotaxic array of Montreal Neurologic Institute.

**Table S2.** Relation between left amygdala activity, clinical, demographic and experiment performance variables in BD in the Fear experiment

|                                                                        | <b>BDd (n=15)</b><br><b>Left Amygdala Activity</b> |              |              |             |              |             | <b>BDr (n=15)</b><br><b>Left Amygdala Activity</b> |             |             |              |             |             |      |         |     |         |    |     |
|------------------------------------------------------------------------|----------------------------------------------------|--------------|--------------|-------------|--------------|-------------|----------------------------------------------------|-------------|-------------|--------------|-------------|-------------|------|---------|-----|---------|----|-----|
|                                                                        | <b>Fear Experiment</b>                             |              |              |             |              |             | <b>Fear Experiment</b>                             |             |             |              |             |             |      |         |     |         |    |     |
|                                                                        | Intense                                            |              | Mild         |             | Neutral      |             | Intense                                            |             | Mild        |              | Neutral     |             |      |         |     |         |    |     |
|                                                                        | r                                                  | p value      | r            | p value     | r            | p value     | r                                                  | p value     | r           | p value      | r           | p value     | r    | p value | r   | p value |    |     |
| <b>Age at Scan</b>                                                     | <b>-0.66</b>                                       | <b>0.008</b> | <i>-0.48</i> | <i>0.07</i> | <b>-0.52</b> | <b>0.05</b> | 0.18                                               | 0.52        | 0.28        | 0.31         | <i>0.46</i> | <i>0.08</i> |      |         |     |         |    |     |
| <b>Age of Illness Onset</b>                                            | -0.33                                              | 0.23         | -0.28        | 0.32        | -0.23        | 0.41        | -0.24                                              | 0.39        | -0.17       | 0.54         | 0.19        | 0.49        |      |         |     |         |    |     |
| <b>Illness Duration</b>                                                | <i>-0.45</i>                                       | <i>0.09</i>  | <i>-0.29</i> | <i>0.29</i> | <i>-0.38</i> | <i>0.16</i> | <b>0.55</b>                                        | <b>0.03</b> | <b>0.61</b> | <b>0.016</b> | 0.43        | 0.11        |      |         |     |         |    |     |
| <b>HRSD-25</b>                                                         | 0.04                                               | 0.90         | 0.07         | 0.80        | 0.21         | 0.45        | 0.18                                               | 0.53        | 0.28        | 0.31         | 0.09        | 0.75        |      |         |     |         |    |     |
| <b>Medication Load</b>                                                 | -0.13                                              | 0.64         | -0.35        | 0.20        | -0.38        | 0.16        | -0.21                                              | 0.44        | 0.39        | 0.15         | 0.14        | 0.61        |      |         |     |         |    |     |
| <b>Face Expression Accuracy</b>                                        | -0.17                                              | 0.55         | 0.10         | 0.72        | 0.27         | 0.33        | -0.42                                              | 0.12        | -0.37       | 0.18         | -0.37       | 0.17        |      |         |     |         |    |     |
|                                                                        | t                                                  | df           | p            | t           | df           | p           | t                                                  | df          | p           | t            | df          | p           | t    | df      | p   | t       | df | p   |
| <b>Gender (Male/Female)</b>                                            | -0.24                                              | 13           | 0.81         | 0.06        | 13           | 0.95        | 0.15                                               | 13          | 0.89        | -0.54        | 13          | 0.6         | -1.4 | 13      | 0.2 | -0.02   | 13 | 0.9 |
| <b>Mood Stabilizers (ON/OFF)</b>                                       | -0.272                                             | 13           | 0.79         | -1.1        | 13           | 0.29        | -0.4                                               | 13          | 0.7         | 0.56         | 13          | 0.6         | 0.89 | 13      | 0.4 | 1.4     | 13 | 0.2 |
| <b>Antipsychotics (ON/OFF)</b>                                         | 0.099                                              | 13           | 0.92         | -1.2        | 13           | 0.27        | -1.2                                               | 13          | 0.24        | -0.2         | 13          | 0.8         | 1.57 | 13      | 0.1 | 0.48    | 13 | 0.6 |
| <b>Antidepressants (ON/OFF)</b>                                        | -0.641                                             | 13           | 0.53         | -0.7        | 13           | 0.51        | -0.9                                               | 13          | 0.37        | -0.27        | 13          | 0.8         | 0.26 | 13      | 0.8 | 0.53    | 13 | 0.6 |
| <b>Benzodiazepines (ON/OFF)</b>                                        | -0.805                                             | 13           | 0.44         | -1.6        | 13           | 0.13        | -0.7                                               | 13          | 0.51        | -0.15        | 13          | 0.9         | 0.3  | 13      | 0.8 | 0.62    | 13 | 0.5 |
| <b>Lifetime Presence of Alcohol/Drugs Abuse or Dependence (YES/NO)</b> | 0.1052                                             | 4            | 0.92         | -0.1        | 11           | 0.93        | 0.66                                               | 11          | 0.52        | 0.74         | 13          | 0.5         | 0.47 | 13      | 0.6 | -0.5    | 13 | 0.6 |

BDd, bipolar disorder patients in depressed episode; BDr, bipolar disorder patients in remission; HRSD-25, 25-item Hamilton Rating Scale for Depression. r: Pearson correlation; bold: survive statistical threshold; italic: trend level.

**Table S3.** Relation between left amygdala activity, clinical, demographic and experiment performance variables in MDDd in the Fear experiment

|                                                                        | <b>MDDd (n=15)</b>            |                |          |                |           |                |                |                |          |
|------------------------------------------------------------------------|-------------------------------|----------------|----------|----------------|-----------|----------------|----------------|----------------|----------|
|                                                                        | <b>Left Amygdala Activity</b> |                |          |                |           |                |                |                |          |
|                                                                        | <b>Fear Experiment</b>        |                |          |                |           |                |                |                |          |
|                                                                        | <b>Intense</b>                |                |          | <b>Mild</b>    |           |                | <b>Neutral</b> |                |          |
|                                                                        | <b>r</b>                      | <b>p value</b> | <b>r</b> | <b>p value</b> | <b>r</b>  | <b>p value</b> | <b>r</b>       | <b>p value</b> |          |
| <b>Age at Scan</b>                                                     | 0.18                          | 0.53           | 0.13     | 0.65           | -0.12     | 0.67           |                |                |          |
| <b>Age of Illness Onset</b>                                            | -0.08                         | 0.77           | -0.10    | 0.71           | -0.11     | 0.71           |                |                |          |
| <b>Illness Duration</b>                                                | 0.24                          | 0.39           | 0.21     | 0.46           | -0.04     | 0.89           |                |                |          |
| <b>HRSD-25</b>                                                         | 0.31                          | 0.26           | 0.31     | 0.26           | 0.35      | 0.20           |                |                |          |
| <b>Medication Load</b>                                                 | 0.32                          | 0.24           | 0.33     | 0.22           | 0.43      | 0.11           |                |                |          |
| <b>Face Expression Accuracy</b>                                        | 0.04                          | 0.87           | 0.05     | 0.86           | -0.01     | 0.98           |                |                |          |
|                                                                        | <b>t</b>                      | <b>df</b>      | <b>p</b> | <b>t</b>       | <b>df</b> | <b>p</b>       | <b>t</b>       | <b>df</b>      | <b>p</b> |
| <b>Gender (Male/Female)</b>                                            | 1.11                          | 13             | 0.29     | 0.8            | 13        | 0.44           | 1.14           | 13             | 0.27     |
| <b>Antipsychotics (ON/OFF)</b>                                         | 0.8731                        | 13             | 0.4      | 0.64           | 13        | 0.53           | 1.49           | 13             | 0.16     |
| <b>Antidepressants (ON/OFF)</b>                                        | 0.7811                        | 13             | 0.45     | 1.4            | 13        | 0.19           | 0.7            | 13             | 0.5      |
| <b>Benzodiazepines (ON/OFF)</b>                                        | -0.21                         | 13             | 0.84     | -0.1           | 13        | 0.95           | 0.47           | 13             | 0.64     |
| <b>Lifetime Presence of Alcohol/Drugs Abuse or Dependence (YES/NO)</b> | 0.0566                        | 13             | 0.96     | -1             | 13        | 0.35           | -0.1           | 13             | 0.89     |

MDDd, major depressive disorder patients in depressed episode; HRSD-25: 25-item Hamilton Rating Scale for Depression.

r: Pearson correlation.

**Table S4.** Relation between left amygdala activity, demographic and experiment performance variables in HC in the Sad and Fear Experiment

| HC (n=15)                      |             |           |             |         |     |             |             |     |         |         |     |      |
|--------------------------------|-------------|-----------|-------------|---------|-----|-------------|-------------|-----|---------|---------|-----|------|
| Left Amygdala Activity         |             |           |             |         |     |             |             |     |         |         |     |      |
| Sad Experiment                 |             |           |             |         |     |             |             |     |         |         |     |      |
|                                | Mean        |           | Intense     |         |     | Mild        |             |     | Neutral |         |     |      |
|                                | r           | p value   | r           | p value |     | r           | p value     |     | r       | p value |     |      |
| <b>Age at Scan</b>             | 0.11        | 0.70      | 0.12        | 0.66    |     | 0.13        | 0.64        |     | 0.02    | 0.95    |     |      |
| <b>Accuracy Emotional Face</b> | 0.35        | 0.20      | 0.26        | 0.35    |     | <i>0.47</i> | <i>0.08</i> |     | -0.02   | 0.94    |     |      |
| <b>Accuracy Neutral Face</b>   | 0.14        | 0.61      |             |         |     |             |             |     |         |         |     |      |
|                                |             |           | t           | df      | p   | t           | df          | p   | t       | df      | p   |      |
| <b>Gender (Male/Female)</b>    | <i>1.96</i> | <i>13</i> | <i>0.07</i> | 0.37    | 13  | 0.7         | 1.03        | 13  | 0.3     | 2.09    | 2   | 0.16 |
| Fear Experiment                |             |           |             |         |     |             |             |     |         |         |     |      |
|                                |             |           | Intense     |         |     | Mild        |             |     | Neutral |         |     |      |
|                                | r           | p value   | r           | p value |     | r           | p value     |     | r       | p value |     |      |
| <b>Age at Scan</b>             |             |           | -0.36       | 0.18    |     | -0.48       | 0.07        |     | -0.15   | 0.60    |     |      |
| <b>Accuracy Emotional Face</b> |             |           | -0.41       | 0.13    |     | -0.35       | 0.20        |     | -0.21   | 0.44    |     |      |
| <b>Accuracy Neutral Face</b>   |             |           |             |         |     |             |             |     |         |         |     |      |
|                                |             |           | t           | df      | p   | t           | df          | p   | t       | df      | p   |      |
| <b>Gender (Male/Female)</b>    |             |           | -1          | 13      | 0.3 | -0.2        | 13          | 0.9 | -1.5    | 13      | 0.2 |      |

HC, healthy control.

italic: trend level; r: Pearson correlation.



**Table S5.** Post hoc between-group comparison in amygdala activity in the Sad experiment in the female subgroup, and in the significant left amygdala cluster arising in the group x emotion interaction in whole brain analyses

|                                                 | BDd > BDr      |                  |             | BDd > MDDd       |              |             | BDd > HC         |              |             | BDr > MDDd     |             |             | BDr > HC       |             |             | MDDd > HC      |     |       |
|-------------------------------------------------|----------------|------------------|-------------|------------------|--------------|-------------|------------------|--------------|-------------|----------------|-------------|-------------|----------------|-------------|-------------|----------------|-----|-------|
|                                                 | t <sup>c</sup> | p                | d           | t <sup>d</sup>   | p            | d           | t <sup>e</sup>   | p            | d           | t <sup>f</sup> | p           | d           | t <sup>g</sup> | p           | d           | t <sup>h</sup> | p   | d     |
| <b>Sad Experiment - Females only</b>            |                |                  |             |                  |              |             |                  |              |             |                |             |             |                |             |             |                |     |       |
| Mean Left Amygdala <sup>a</sup>                 | <b>4.4</b>     | <b>&lt;0.001</b> | <b>1.84</b> | <b>3.4</b>       | <b>0.002</b> | <b>1.31</b> | <b>3.5</b>       | <b>0.002</b> | <b>1.35</b> | -0.8           | 0.4         | 0.33        | -0.8           | 0.4         | 0.35        | -0.02          | 1.0 | <0.01 |
| Intense Left Amygdala <sup>b</sup>              | 1.5            | 0.2              | 0.61        | 1.6              | 0.1          | 0.62        | 2.0              | <i>0.05</i>  | <i>0.80</i> | 0.1            | 0.9         | 0.05        | 0.6            | 0.5         | 0.27        | 0.5            | 0.6 | 0.2   |
| Mild Left Amygdala <sup>b</sup>                 | 2.6            | <i>0.02</i>      | <i>1.03</i> | 2.5              | <i>0.02</i>  | <i>0.96</i> | 2.0              | <i>0.05</i>  | <i>0.79</i> | -0.4           | 0.7         | 0.18        | -1.0           | 0.3         | 0.43        | -0.7           | 0.5 | 0.3   |
| Neutral Left Amygdala <sup>b</sup>              | <b>3.9</b>     | <b>0.001</b>     | <b>1.63</b> | 3.3              | <i>0.003</i> | <i>1.28</i> | <b>3.5</b>       | <b>0.002</b> | <b>1.38</b> | -1.4           | 0.2         | 0.56        | -1.3           | 0.2         | 0.56        | 0.1            | 0.9 | <0.01 |
| <b>Sad Experiment – Whole brain interaction</b> |                |                  |             |                  |              |             |                  |              |             |                |             |             |                |             |             |                |     |       |
|                                                 | t <sup>i</sup> | p                | d           | t <sup>i</sup>   | p            | d           | t <sup>i</sup>   | p            | d           | t <sup>i</sup> | p           | d           | t <sup>i</sup> | p           | d           | t <sup>i</sup> | p   | d     |
| Mean Left Amygdala <sup>a</sup>                 | <b>5.9</b>     | <b>&lt;0.001</b> | <b>2.14</b> | 2.4 <sup>g</sup> | <i>0.02</i>  | <i>0.89</i> | 1.9 <sup>g</sup> | 0.07         | 0.68        | -2.0           | <i>0.05</i> | <i>0.73</i> | -2.3           | <i>0.03</i> | <i>0.85</i> | -0.4           | 0.7 | 0.1   |
| Intense Left Amygdala <sup>b</sup>              | -0.2           | 0.9              | 0.05        | -0.2             | 0.9          | 0.07        | 0.9              | 0.4          | 0.34        | -0.1           | 0.9         | 0.03        | 1.1            | 0.3         | 0.41        | 0.9            | 0.4 | 0.3   |
| Mild Left Amygdala <sup>b</sup>                 | <b>4.8</b>     | <b>&lt;0.001</b> | <b>1.77</b> | 3.1              | <i>0.004</i> | <i>1.14</i> | 0.9 <sup>g</sup> | 0.4          | 0.34        | -2.2           | <i>0.03</i> | <i>0.81</i> | -2.9           | <i>0.01</i> | <i>1.07</i> | -1.2           | 0.2 | 0.5   |
| Neutral Left Amygdala <sup>b</sup>              | <b>6.1</b>     | <b>&lt;0.001</b> | <b>2.23</b> | 2.9              | <i>0.008</i> | <i>1.05</i> | 2.4              | <i>0.03</i>  | <i>0.86</i> | -2.1           | <i>0.05</i> | <i>0.76</i> | -2.6           | <i>0.02</i> | <i>0.95</i> | -0.4           | 0.7 | 0.2   |

BDd, bipolar disorder patients in depressed episode; BDr, bipolar disorder patients in remission; MDDd, major depressive disorder patients in depressed episode; HC, healthy controls

bold: survive statistical threshold; italic: trend level

<sup>a</sup> statistical threshold at p<0.0083

<sup>b</sup> statistical threshold at p<0.0028

<sup>c</sup> degree of freedom equal to 22 unless otherwise specified

<sup>d</sup> degree of freedom equal to 25

<sup>e</sup> degree of freedom equal to 24

<sup>f</sup> degree of freedom equal to 21

<sup>g</sup> degree of freedom equal to 20

<sup>h</sup> degree of freedom equal to 23

<sup>i</sup> degree of freedom equal to 28

**Table S6.** Exploratory whole brain activity during the Happy, Sad and Fear experiments

| Region                           | Side | MNI Coordinates |     |     | k  | F    | z    | p      |
|----------------------------------|------|-----------------|-----|-----|----|------|------|--------|
|                                  |      | X               | Y   | Z   |    |      |      |        |
| <b>Happy Experiment</b>          |      |                 |     |     |    |      |      |        |
| Interaction                      |      |                 |     |     |    |      |      |        |
| Hippocampus                      | R    | 33              | -36 | 3   | 4  | 5.53 | 4.01 | <0.001 |
| Parahippocampal Gyrus (BA30)     | R    | 27              | -51 | 6   | 3  | 4.92 | 3.68 | <0.001 |
| Anterior Cingulate (BA24)        | R    | 3               | 33  | 9   | 4  | 4.70 | 3.56 | <0.001 |
| Temporal Lobe (BA41)             | R    | 36              | -33 | 12  | 3  | 4.57 | 3.48 | <0.001 |
| Posterior Cingulate Gyrus (BA31) | L    | -18             | -33 | 39  | 3  | 4.19 | 3.24 | 0.001  |
| <b>Sad Experiment</b>            |      |                 |     |     |    |      |      |        |
| Main Effect of Group             |      |                 |     |     |    |      |      |        |
| Cuneus (BA18)                    | R    | 12              | -90 | 18  | 12 | 8.84 | 4.13 | <0.001 |
| Precuneus (BA19)                 | R    | 36              | -72 | 45  | 6  | 7.16 | 3.62 | <0.001 |
| Lingual Gyrus (BA18)             | L    | -9              | -84 | 6   | 5  | 6.55 | 3.41 | <0.001 |
| Inferior Parietal Lobule (BA40)  | L    | -39             | -54 | 45  | 3  | 6.02 | 3.22 | 0.001  |
| Interaction                      |      |                 |     |     |    |      |      |        |
| Amygdala                         | L    | -12             | -3  | -15 | 9  | 5.84 | 4.17 | <0.001 |
| Parahippocampal Gyrus (BA30)     | R    | 6               | -42 | -6  | 3  | 4.77 | 3.59 | <0.001 |
| <b>Fear Experiment</b>           |      |                 |     |     |    |      |      |        |
| Main Effect of Group             |      |                 |     |     |    |      |      |        |
| Cuneus (BA18)                    | R    | 12              | -90 | 21  | 3  | 7.04 | 3.58 | <0.001 |
| Fusiform Gyrus (BA37)            | L    | -27             | -51 | -12 | 4  | 6.01 | 3.22 | <0.001 |
| Interaction                      |      |                 |     |     |    |      |      |        |
| Inferior Frontal Gyrus (BA47)    | R    | 39              | 33  | -18 | 3  | 5.76 | 4.13 | <0.001 |
| Thalamus                         | R    | 21              | -3  | 9   | 4  | 4.61 | 3.50 | <0.001 |

R, right; L, left; BA, Brodmann area.

k: cluster size; Coordinates correspond to the stereotaxic array of Montreal Neurologic Institute.

1. Versace A, Almeida JR, Hassel S, Walsh ND, Novelli M, Klein CR, *et al.* (2008): Elevated left and reduced right orbitomedial prefrontal fractional anisotropy in adults with bipolar disorder revealed by tract-based spatial statistics. *Arch Gen Psychiatry* 65:1041-1052.
2. Almeida JR, Akkal D, Hassel S, Travis MJ, Banihashemi L, Kerr N, *et al.* (2009): Reduced gray matter volume in ventral prefrontal cortex but not amygdala in bipolar disorder: significant effects of gender and trait anxiety. *Psychiatry Res* 171:54-68.
3. Hassel S, Almeida JRC, Kerr N, Nau S, Ladouceur CD, Fissell K, *et al.* (2008): Elevated striatal and decreased dorsolateral prefrontal cortical activity in response to emotional stimuli in euthymic bipolar disorder: no associations with psychotropic medication load. *Bipolar Disord* 10:916-927.
4. Sackeim HA (2001): The definition and meaning of treatment-resistant depression. *J Clin Psychiatry* 62:S10.
5. Davis JM, Chen N (2004): Dose response and dose equivalence of antipsychotics. *J Clin Psychopharmacol* 24:192.
